# Supplementary material
Source: publisher site journal article supplement (https://www.spandidos-publications.com/6412/downloadSupplementary)

Figure S1. (A) Positive cytokeratin staining (light blue) represented tumor cell areas of PD-L1<sup>tumor-</sup>/PD-L1<sup>tumor+</sup> samples, so that regions of stromal cells were excluded. Scale bar, 200  $\mu$ m. (B) Kaplan-Meier analysis of recurrence free survival between the PD-L1<sup>tumor-</sup>/PD-L1<sup>tumor+</sup> groups. PD-L1, programmed cell death ligand 1.

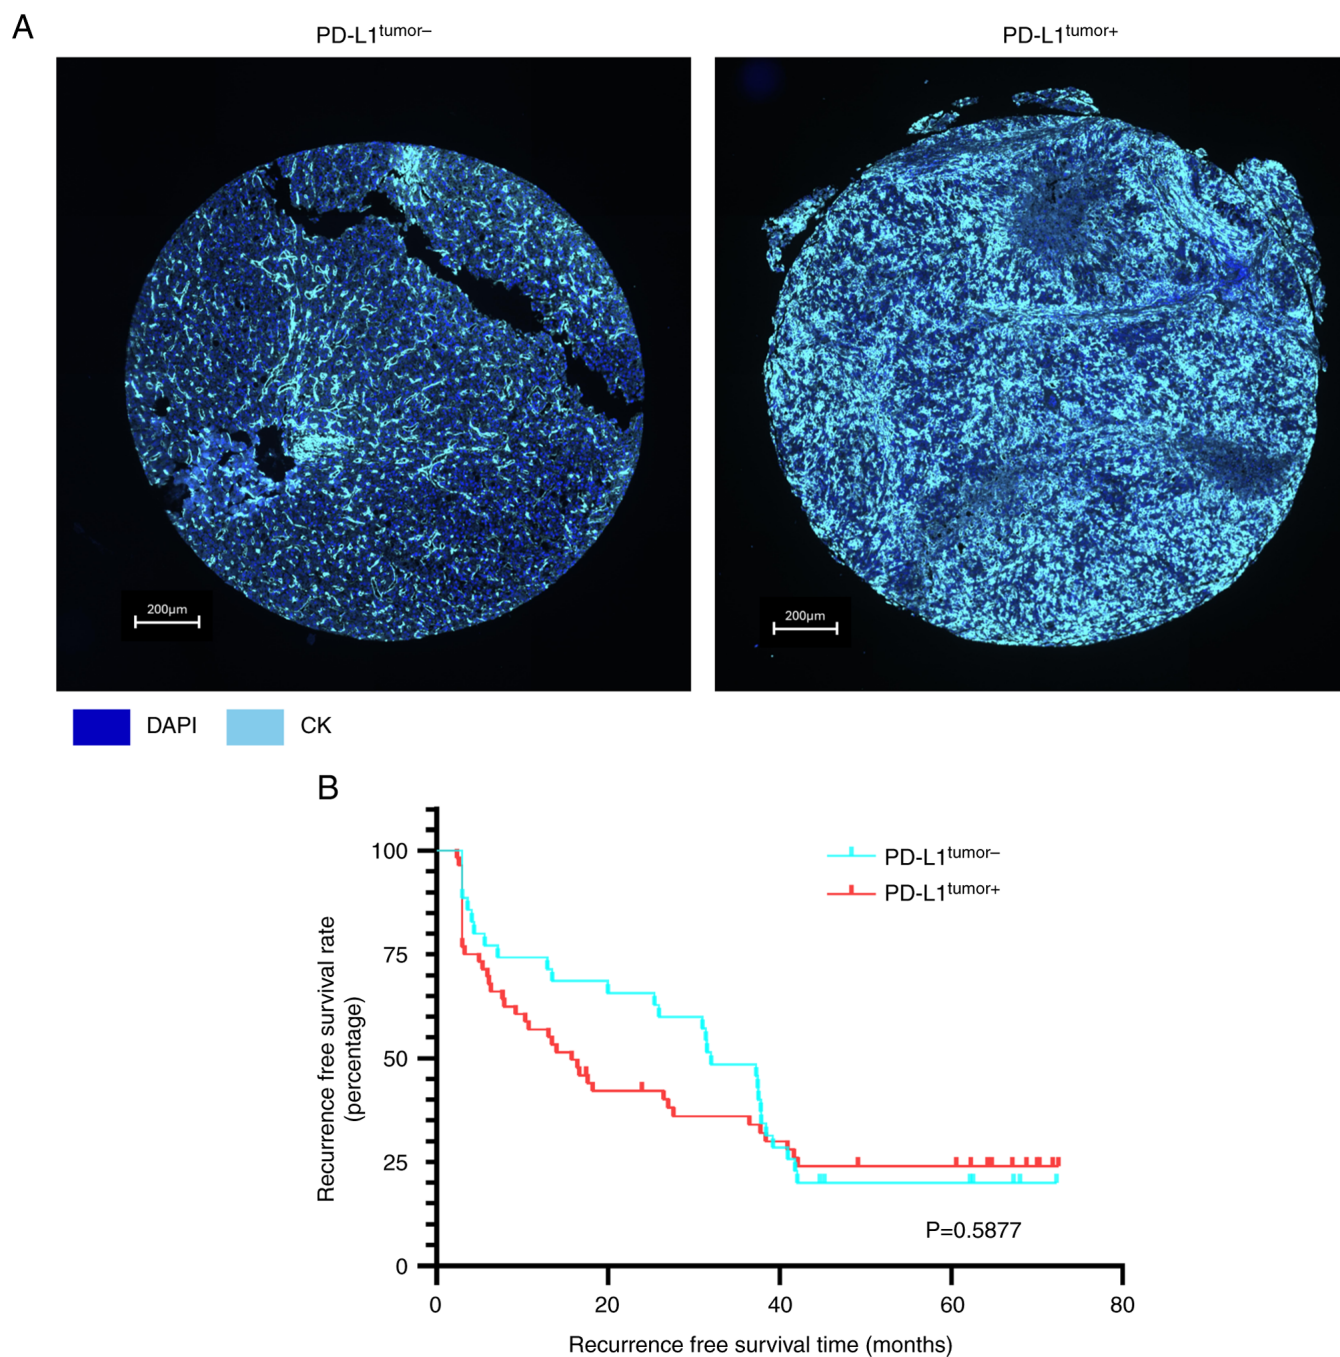

Figure S2. ROC survival curve was used to determine the inclusion criterion of the CD39<sup>T cell+</sup> group to be the ratio of CD39<sup>+</sup> T cells/CD39<sup>-</sup> T cells  $\geq 1.42$  and the inclusion criterion for the CD39<sup>T cell-</sup> group to be the ratio of CD39<sup>+</sup> T cells/CD39<sup>-</sup> T cells  $< 1.42$  (AUC=0.534). AUC, area under the curve; ROC, receiver operator characteristic.

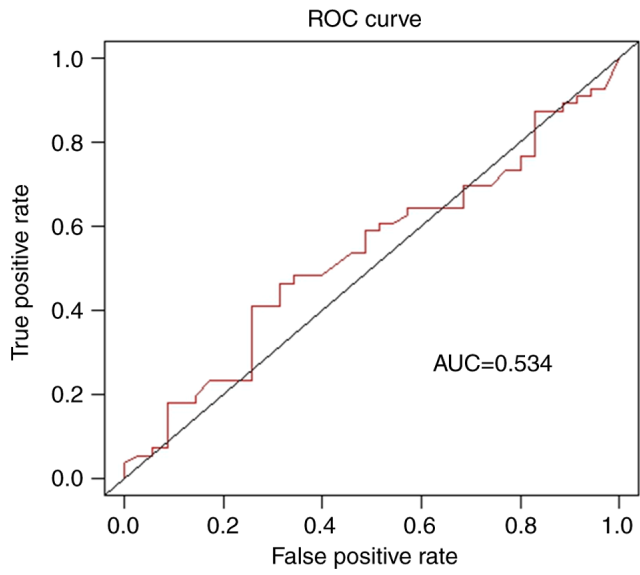

Figure S3. (A) Positive cytokeratin staining (light blue) represented tumor cell areas of CD39<sup>T cell-</sup> and CD39<sup>T cell+</sup> samples, so that regions of stromal cells were excluded. Scale bar, 200  $\mu$ m. (B) Kaplan-Meier analysis of recurrence free survival between the CD39<sup>T cell-</sup>/CD39<sup>T cell+</sup> groups.

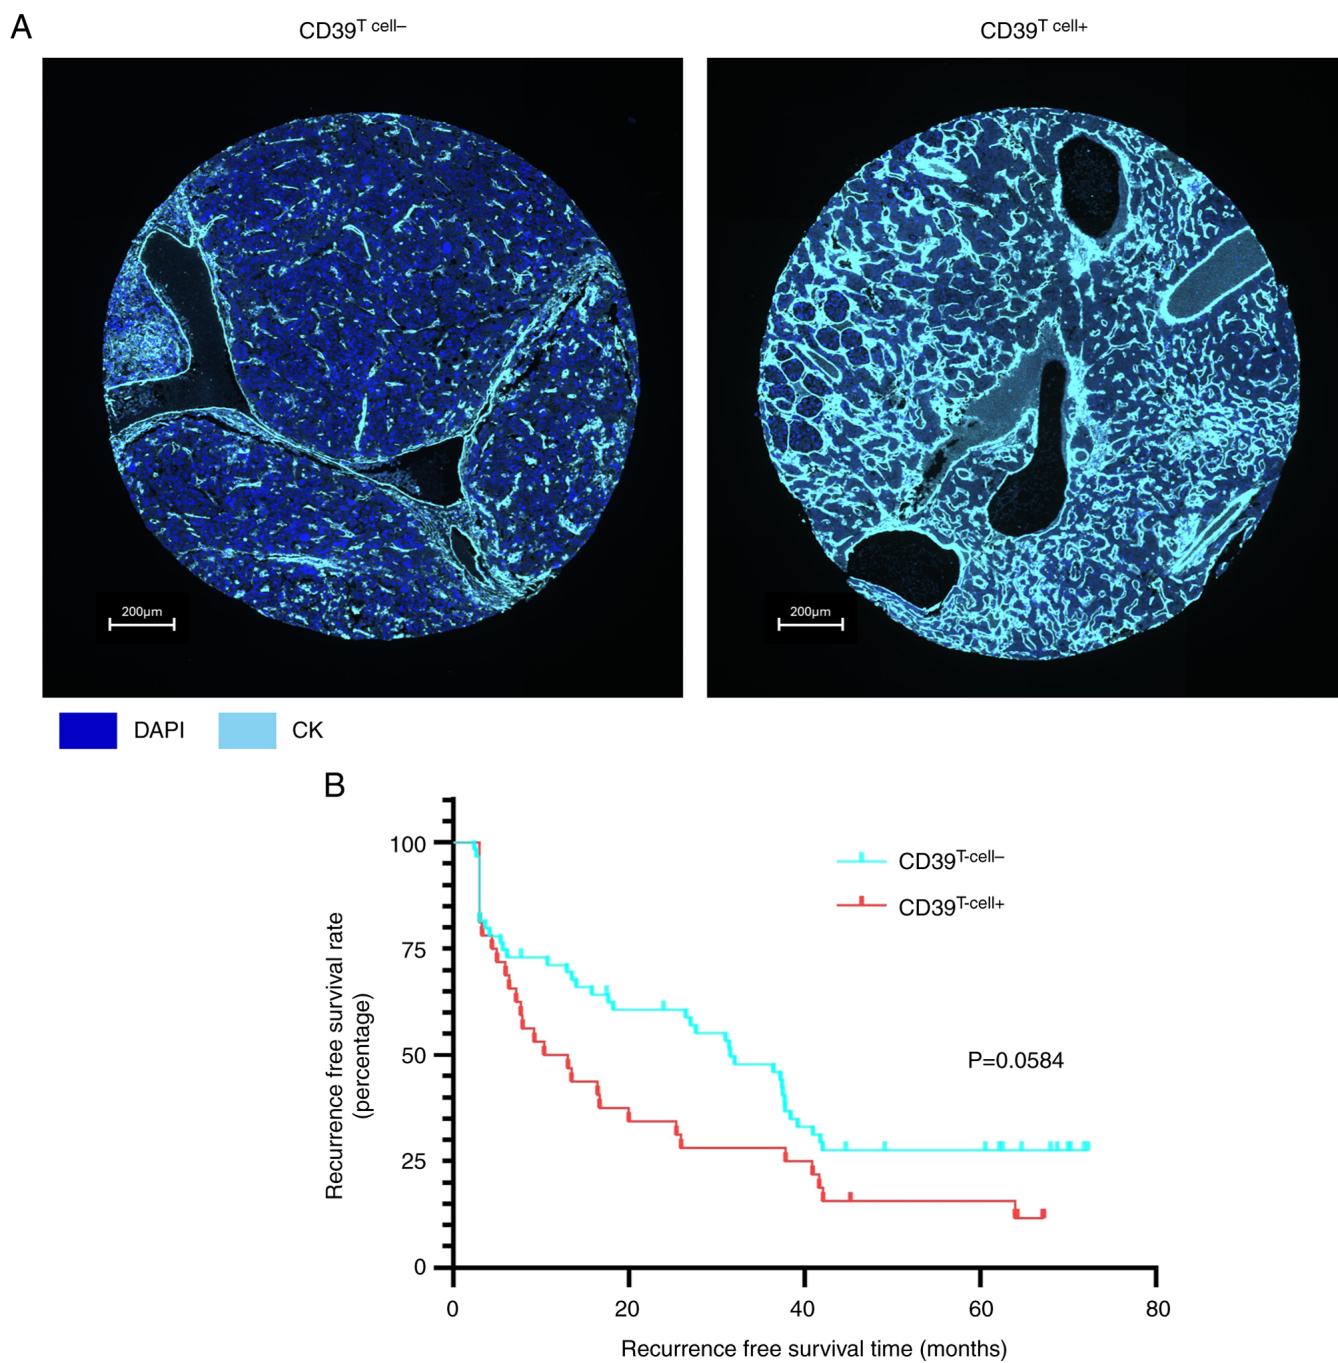

Figure S4. Kaplan-Meier analysis of recurrence free survival between the (A) co-upregulated/non-co-upregulated groups and (B) co-upregulated/co-low-expression groups. (C) Among the PD-L1<sup>tumor+</sup> group, patient samples were further divided into two subgroups according to the expression level of CD39 in CD8<sup>+</sup> T cells (PD-L1<sup>tumor+</sup>/CD39<sup>T cell-</sup>: PD-L1<sup>+</sup> cell count  $\geq 1\%$  in the tumor region and CD39<sup>+</sup> T cell/CD39<sup>-</sup> T cell  $< 1.42$ ; PD-L1<sup>tumor+</sup>/CD39<sup>T cell+</sup>: PD-L1<sup>+</sup> cell count  $\geq 1\%$  in the tumor region and CD39<sup>+</sup> T cell/CD39<sup>-</sup> T cell  $\geq 1.42$ ). Kaplan-Meier analysis indicated no significant difference in overall survival was observed between the two subgroups ( $P=0.1017$ ). PD-L1, programmed cell death ligand 1.

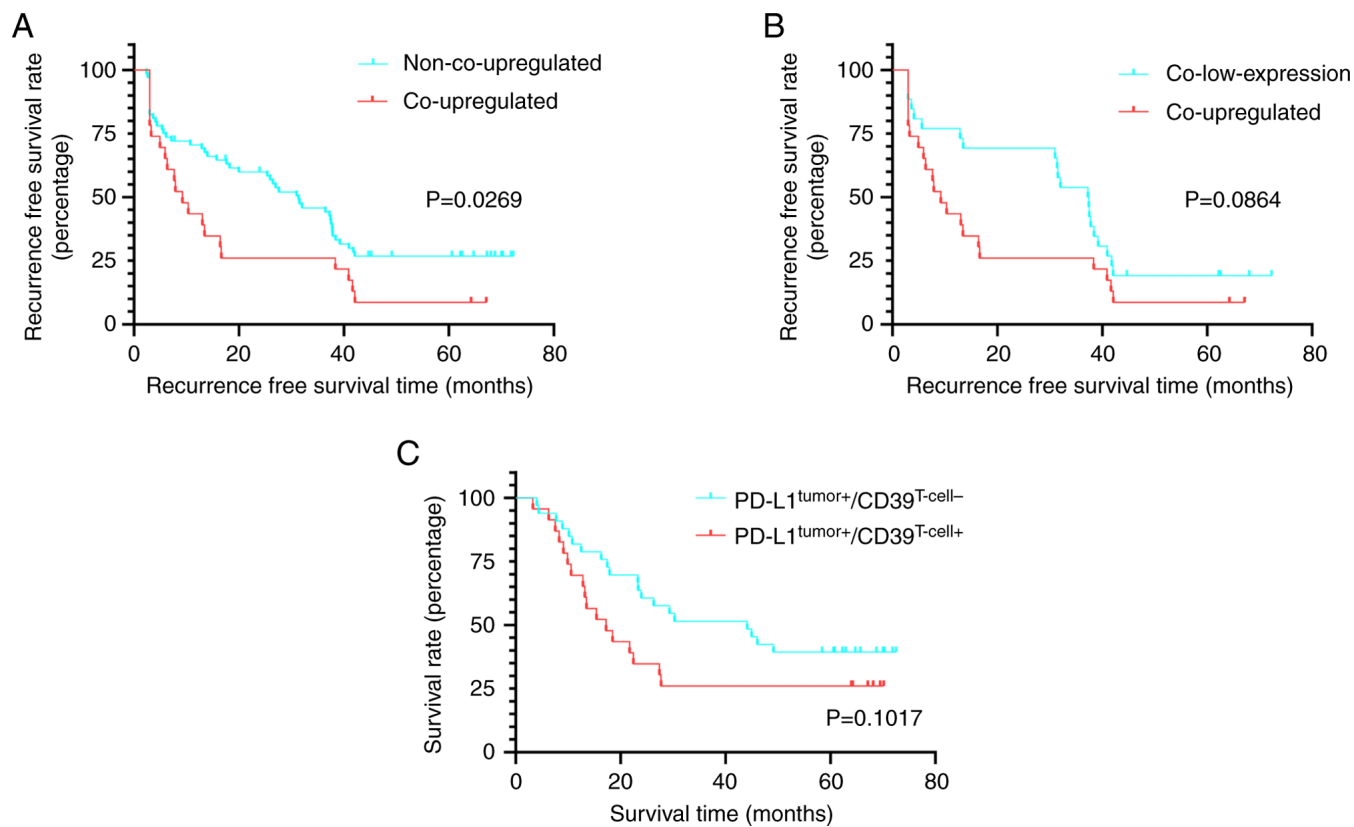

Supplement: Supplementary file 1 [file downloadSupplementary]
